# Supplementary material for: Pharmacological Inhibition of CCR2 Signaling Exacerbates Exercise-Induced Inflammation Independently of Neutrophil Infiltration and Oxidative Stress
Source: MDPI journal article supplement (doi:10.3390/immuno2010003), 2021-12-27
Supplement: s1 [file s1]

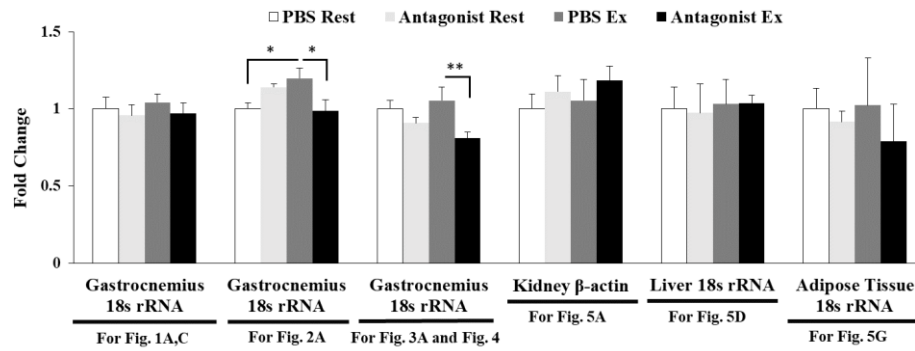

**Figure S1.** Gene expression of the housekeeping gene ( $n = 6$ , in each tissue). Data are shown as mean  $\pm$  SE. Data were analyzed using two-way ANOVA followed by Bonferroni post hoc test [ $*p < 0.05$ ,  $**p < 0.01$ ]. ANOVA, analysis of variance; SE, standard error.
